# Supplementary material
Source: HighWire-hosted journal article supplement (https://rc.rcjournal.com/highwire/filestream/17882/field_highwire_adjunct_files/0/suppl_1.pdf)
Supplement: suppl_1.pdf [file suppl_1.pdf]

## Appendix 1 Normalization Formulas<sup>21</sup>

$$AH_{\text{insp at AHeR}} : AHeR + (AH_{\text{inspM}} - AHe) * (AHa - AHeR) / (AHa - AHe)$$

AHeR : the reference environmental humidity chosen to be 5 mg/L

$$AH_{\text{insp at AHeR}} : AH_{\text{insp}} \text{ at AHeR}$$

AH<sub>inspM</sub>: the measured AH<sub>insp</sub>

AHa: the saturation humidity at body temperature of the volunteer was used

AHe: the environmental humidity during the measurement.

$$\Delta W_{\text{at AHeR}} = \Delta WM * (AHa - AHeR) / (AHa - AHe)$$

ΔWM : the measured ΔW (weight change)

$$\Delta WM : \Delta WM \text{ at AHeR}$$

The formulas are a simplification and do only normalize for the actual measured AHe variation and does not take any other dependencies into account (such as the impact of dead space on AH<sub>insp</sub>). Using the body temperature to calculate AHa is only justified when AHa is much larger than both AHeR and AHe. Normalization for body temperature of the volunteers could have been done in a similar way, but was not performed as body temperature of the volunteer was constant within 0.6 °C (the corresponding error in the weight change is less than 3%).
